# Supplementary material
Source: bioRxiv or medRxiv preprint supplement (https://www.biorxiv.org/content/biorxiv/early/2022/12/23/2022.12.23.521750/DC1/embed/media-1.pdf)

Healthy1167

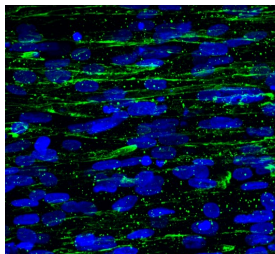

DMD571

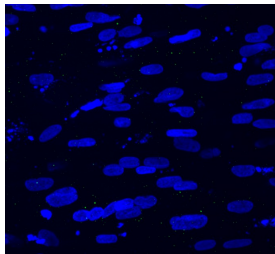

DMD1023

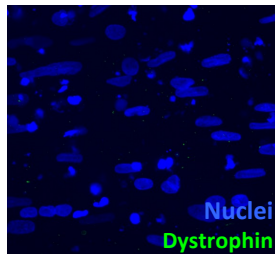

Healthy1190

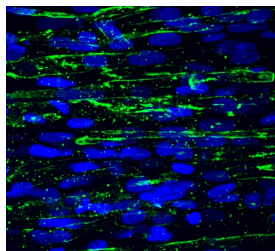

DMD5

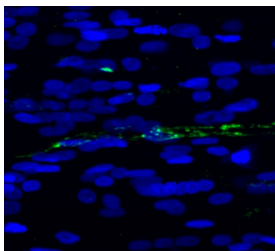

DMD1071

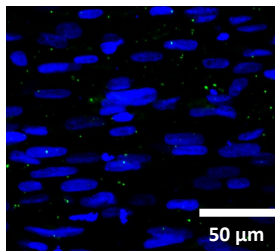

Supplement: Supplementary file [file media-1.pdf]
